# Supplementary material
Source: PubMed Central journal article supplement (PMC3791738)
Supplement: 1313683110_pnas.201313683SI.pdf [file 1313683110_pnas.201313683SI.pdf]

# Supporting Information

Ereño-Orbea et al. 10.1073/pnas.1313683110

## SI Materials and Methods

**Constructs and Purification of the Recombinant Proteins.** The preparation of a pET28-C-hCBSOPT $\Delta$ 516–525 expression construct is described in detail elsewhere (1). We used the same mutagenesis oligonucleotides to delete the residues 516–525 in our pGEX-6P1-hCBSOPT construct (2). The pET28-C-hCBSOPT $\Delta$ 1–39 $\Delta$ 516–525 was prepared by cloning the desired sequence into pET28a vector (Novagen) in a way similar to that described previously (3). The insert was amplified by proofreading PCR using the pET28-C-hCBSOPT $\Delta$ 516–525 as a DNA template and the following primers: forward, 5'-ctagCCATGGaacgctgtgattcgccgg, and reverse, 5'-ctagCTCGAGtttctgtgacgttctgtgccc (capital letters designate NcoI and XhoI sites introduced by forward and reverse primers, respectively). Both the PCR product and vector were cleaved overnight with NcoI and XhoI (New England Biolabs), separated in 1% agarose gel, cut out, and cleaned up. Ligation was performed using the QuickLigation Kit (New England Biolabs) according to the manufacturer's recommendations. The D444N pathogenic mutation was introduced by using a QuikChange II XL mutagenesis kit (Agilent) according to the manufacturer's recommendations. The D444N mutagenesis oligonucleotides were forward, 5'-aatctcgtgtaaaaaaggttttAATcagggcccgg, and reverse, 5'-ccgggacctgATTaaacctttttcagcaggatt (capital letters designate the codon of the mutated residue). Purification of recombinant proteins followed the protocols that we developed for various human cystathionine  $\beta$ -synthase (hCBS) constructs carrying either cleavable GST at the N terminus (2) or a permanent 6xHis tag at the C terminus (3) with a few modifications (1).

**Biochemical Characterization of the Purified Enzymes.** Protein concentrations were determined by the Bradford method (Thermo Pierce) using BSA as a standard according to the manufacturer's recommendations. Denatured proteins were separated by SDS/PAGE using 10% polyacrylamide precast gels (Mini-PROTEAN TGX; Bio-Rad); the native samples were separated in 4–15% polyacrylamide gradient precast gels (Mini-PROTEAN TGX; Bio-Rad). For visualization, the denatured gels were stained with Simple Blue (Invitrogen). Western blot analysis of crude cell lysates under denaturing or native conditions was performed as described previously (2). The CBS activity in the classical reaction was determined by a previously described radioisotope assay using [ $^{14}$ C(U)] L-serine as the labeled substrate, essentially as described elsewhere (2, 3).

**Crystallization and Data Collection.** The crystal structure of the full-length hCBS was determined using two different protein constructs, referred to as C-hCBS $\Delta$ 516–525 and hCBSOPT $\Delta$ 516–525, that differ mainly by the presence or absence of a 6xHis-tag at the C terminus. Both constructs encompass the full-length hCBS protein and lack the residues 516–525 from the long loop connecting the strands  $\beta$ 15 and  $\beta$ 16 that favored the crystallization. The crystals of C-hCBSOPT $\Delta$ 516–525 and hCBSOPT $\Delta$ 516–525 were grown by the sitting-drop vapor-diffusion method at 293 K

in 96-well crystallization plates according to the protocol described previously (1). Drops consisted of 100 nL of protein solution mixed with 200 nL of the precipitant solution [30% (vol/vol) polyethylene glycol monomethyl ether 550, 0.1 M sodium citrate tribasic dehydrate (pH 5.0)] and 100 nL of the seed-stock; the protein concentration was 21 mg/mL. Single crystals were transferred to a cryoprotection solution (paraffin oil) and flash frozen in liquid nitrogen.

To determine the structure of the human enzyme bearing the D444N mutation, we used two different protein constructs, referred to as C-hCBSOPT $\Delta$ 516–525 D444N and C-hCBSOPT $\Delta$ 1–39 $\Delta$ 516–525 D444N, respectively. The crystals were obtained by the hanging-drop vapor-diffusion method at 293 K in 24-well crystallization plates. Drops consisted of 200 nL of protein solution mixed with 400 nL precipitant solution [0.085 M Hepes-Na (pH 7.5), 8.5% (vol/vol) iso-propanol, 17% (wt/vol) polyethylene glycol 4000, 15% (vol/vol) glycerol anhydrous, 0.2 M ammonium citrate tribasic (pH 7.0), 0.1 M imidazole (pH 7.0), 20% (wt/vol) polyethylene glycol monomethyl ether 2000] and 200 nL of the seed-stock; the protein concentration was 25 mg/mL for both samples. The C-hCBSOPT $\Delta$ 516–525 D444N crystals were directly flash frozen in liquid nitrogen. Single crystals of C-hCBSOPT $\Delta$ 1–39 $\Delta$ 516–525 D444N were transferred to a cryoprotection solution [crystallization buffer with 30% (wt/vol) polyethylene glycol 400] and flash frozen in liquid nitrogen. All datasets used in this work were collected at European Synchrotron Radiation Facility, Grenoble beamlines ID23-1 (C-hCBSOPT $\Delta$ 516–525,  $\lambda = 0.9793$  Å; hCBSOPT $\Delta$ 516–525,  $\lambda = 0.9725$  Å; C-hCBSOPT $\Delta$ 516–525 D444N,  $\lambda = 0.9763$  Å) and ID29 (C-hCBSOPT $\Delta$ 1–39 $\Delta$ 516–525 D444N,  $\lambda = 0.9790$  Å) and were processed using HKL2000 (4) or XDS (5) software.

**X-Ray Diffraction Data Collection, Phasing, and Refinement.** The hCBS structure was determined by molecular replacement with the PHENIX program (6) using the crystal structure of the truncated 45-kDa hCBS [Protein Data Bank (PDB) code 1JBQ] as the initial search model. After several cycles of refinement using PHENIX and REFMAC5 (7), CBS domains were built manually using Coot (8). Crystallographic refinement was carried out with REFMAC5 with TLS parameters. The three other crystal structures were determined by molecular replacement with the PHENIX program using the crystal structure of C-hCBSOPT $\Delta$ 516–525 as the initial search model. For refinement, PHENIX and REFMAC5 were used. The following are the Ramachandran statistics for the refined coordinates [residues in favored region (%), number of outliers]: C-hCBSOPT $\Delta$ 516–525 (96.95, 0), hCBSOPT $\Delta$ 516–525 (97.71, 0), C-hCBSOPT $\Delta$ 516–525 D444N (98.28, 0.1), and C-hCBSOPT $\Delta$ 1–39 $\Delta$ 516–525 D444N (98.18, 0). The final refinement statistics are summarized in Table S1. Atomic coordinates and structure factors have been deposited in the PDB under accession codes 4L0D, 4L3V, 4L27 and 4L28.

1. Oyenarte I, et al. (2012) Purification, crystallization and preliminary crystallographic analysis of human cystathionine  $\beta$ -synthase. *Acta Crystallogr Sect F Struct Biol Cryst Commun* 68(Pt 11):1318–1322.  
2. Majtan T, Liu L, Carpenter JF, Kraus JP (2010) Rescue of cystathionine beta-synthase (CBS) mutants with chemical chaperones: Purification and characterization of eight CBS mutant enzymes. *J Biol Chem* 285(21):15866–15873.  
3. Majtan T, Kraus JP (2012) Folding and activity of mutant cystathionine  $\beta$ -synthase depends on the position and nature of the purification tag: Characterization of the R266K CBS mutant. *Protein Expr Purif* 82(2):317–324.

4. Otwinowski Z, Minor W (1997) Processing of X-ray diffraction data collected in oscillation mode. *Methods Enzymol* 276:307–326.  
5. Kabsch W (2010) Xds. *Acta Crystallogr D Biol Crystallogr* 66(Pt 2):125–132.  
6. Adams PD, et al. (2011) The Phenix software for automated determination of macromolecular structures. *Methods* 55(1):94–106.  
7. Murshudov GN, et al. (2011) REFMAC5 for the refinement of macromolecular crystal structures. *Acta Crystallogr D Biol Crystallogr* 67(Pt 4):355–367.  
8. Emsley P, Lohkamp B, Scott WG, Cowtan K (2010) Features and development of Coot. *Acta Crystallogr D Biol Crystallogr* 66(Pt 4):486–501.







**Table S1. Data collection and refinement**

| Parameter                            | C-hCBSOPT $\Delta$ 516–525   | hCBSOPT $\Delta$ 516–525 | C-hCBSOPT $\Delta$ 516–525 D444N              | C-hCBSOPT $\Delta$ 1–39 $\Delta$ 516–525 D444N |
|--------------------------------------|------------------------------|--------------------------|-----------------------------------------------|------------------------------------------------|
| PDB code                             | 4L0D                         | 4L3V                     | 4L28                                          | 4L27                                           |
| Data collection                      |                              |                          |                                               |                                                |
| Space group                          | I222                         | C222 <sub>1</sub>        | P2 <sub>1</sub> 2 <sub>1</sub> 2 <sub>1</sub> | P6 <sub>5</sub>                                |
| Cell dimensions                      |                              |                          |                                               |                                                |
| a, b, c, Å                           | 124.365, 136.203,<br>169.307 | 227.75, 342.655, 107.253 | 109.498, 131.098, 207.064                     | 190.454, 190.454, 140.847                      |
| $\alpha, \beta, \gamma, ^\circ$      | 90, 90, 90                   | 90, 90, 90               | 90, 90, 90                                    | 90, 90, 120                                    |
| Resolution, Å                        | 50–3.0 (3.1–3.0)             | 48–3.6 (3.8–3.6)         | 48–2.6 (3.5–3.4)                              | 57–3.4 (3.5–3.4)                               |
| R <sub>meas</sub>                    | 0.09 (0.45)                  | 0.31 (1.51)              | 0.36 (0.93)                                   | 0.112 (1.30)                                   |
| I/σ I                                | 11.6 (2.2)                   | 7.25 (2.28)              | 7.62 (2.26)                                   | 15.71 (1.99)                                   |
| Completeness, %                      | 91.6 (90.0)                  | 99.55 (72.47)            | 99.24 (95.92)                                 | 99.72 (97.25)                                  |
| Redundancy                           | 3.7 (3.6)                    | 2.44 (2.37)              | 14.3 (14.5)                                   | 8.61 (8.27)                                    |
| CC <sub>1/2</sub> , %                | 99.6 (66.8)                  | 97.8 (51.2)              | 109.498, 131.098, 207.064                     | 99.9 (61.8)                                    |
| Refinement                           |                              |                          |                                               |                                                |
| Resolution, Å                        | 50–3.0                       | 48–3.6                   | 48–3.4                                        | 57–3.4                                         |
| No. reflections                      | 54,802                       | 46,253                   | 41,267                                        | 40,186                                         |
| R <sub>work</sub> /R <sub>free</sub> | 0.2391/0.2806                | 0.2159/0.2302            | 0.2114/0.2283                                 | 0.2037/0.2405                                  |
| No. atoms                            |                              |                          |                                               |                                                |
| Protein                              | 7,617                        | 11,546                   | 15,271                                        | 15,147                                         |
| Ligand (PLP/HEME)                    | 30/86                        | 45/129                   | 60/172                                        | 60/172                                         |
| B-factors                            |                              |                          |                                               |                                                |
| Protein                              | 99.8                         | 55.2                     | 84.0                                          | 56.9                                           |
| Ligand (PLP/HEME)                    | 75.2/110.0                   | 38.4/45.4                | 67.9/81.7                                     | 35.1/62.3                                      |
| rms deviations                       |                              |                          |                                               |                                                |
| Bond lengths, Å                      | 0.007                        | 0.007                    | 0.008                                         | 0.015                                          |
| Bond angles, °                       | 1.083                        | 1.158                    | 1.090                                         | 1.124                                          |

One crystal was used for each data set. Values in parentheses are for highest-resolution shell.

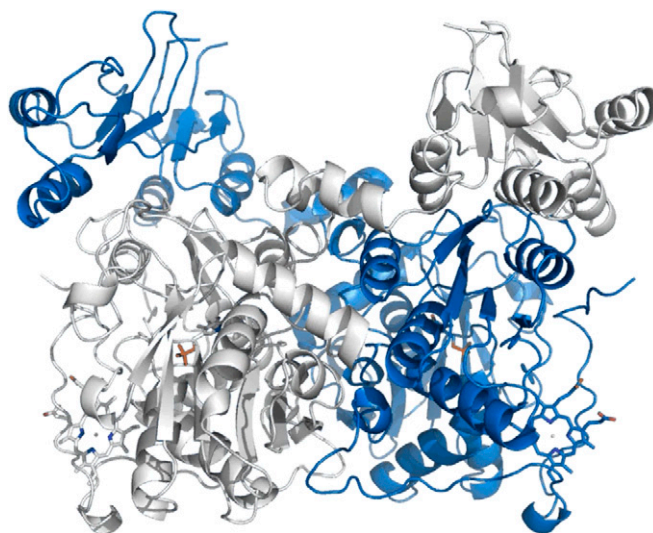

**Movie S1.** The unlikely hCBS-to-dCBS activation mechanism (view 1): an impossible transition from the basal form of hCBS to the constitutively activated conformation reported for dCBS (1). As shown, this mechanism of activation is not possible because it would involve severe clashes between the Bateman modules of the complementary subunits.

1. Koutmos M, Kabil O, Smith JL, Banerjee R (2010) Structural basis for substrate activation and regulation by cystathionine beta-synthase (CBS) domains in cystathionine beta-synthase. *Proc Natl Acad Sci USA* 107(49):20958–20963.

[Movie S1](#)
